# Supplementary material for: Exodus! Large-scale displacement and social adjustments of resident Atlantic spotted dolphins (Stenella frontalis) in the Bahamas
Source: PLoS One. 2017 Aug 9;12(8):e0180304. doi: 10.1371/journal.pone.0180304 (PMC5549894; doi:10.1371/journal.pone.0180304)
Supplement: S2 Fig — Analysis and nMDS for 2013 to 2015 on Great Bahama Bank (GBB). (XLSX) [file pone.0180304.s002.xlsx]

## Sheet: Sheet1
name	cluster	sex	Residency	base	pre	post
ARRY	4	1	BGBB	1	1	2
AVOCADO	4	3	BGBB	1	1	2		Cluster
BANYAN	4	1	BGBB	1	1	2		2	North
BOND	4	3	BGBB	1	1	2		3	South
DELPHI	4	2	BGBB	1	1	2		4	Central
LOTUS	4	2	BGBB	1	1	2		5	RGGB
PIPSQUEAK	4	2	BGBB	1	1	2
TRINITY	2	2	BGBB	1	1	2		Sex
ACHILLES	4	3	MGBB	2	3	3		1	Unknown
AMANDA	4	2	MGBB	3	3	4		2	Female
APPLE	4	2	MGBB	5	5	5		3	Male
BABY	4	2	MGBB	5	5	5
BAMBOO	4	2	MGBB	1	2	3		Base (2008-2010)
BIGGASH	4	3	MGBB	5	5	5		Pre (2011-2012)
BIJYO	4	2	MGBB	2	3	3		Post (2013-2014)
BISHU	4	2	MGBB	5	5	5		1	Unknown
BONITO	4	3	MGBB	2	2	3		2	Two tone
BURGUNDY	2	2	MGBB	3	3	4		3	Speckled
CAROH	4	2	MGBB	5	5	5		4	Mottled
COBALT	4	3	MGBB	1	2	2		5	Fused
DENI	4	2	MGBB	4	5	5
FINESSE	4	3	MGBB	5	5	5		Residency
GEO	4	3	MGBB	5	5	5		BGBB	Born on GBB
INFINITE	3	3	MGBB	2	2	3		MGBB	Moved to GBB (from LBB)
KAI	4	3	MGBB	3	4	5		RGBB	Resident GBB
LAGUNA	4	2	MGBB	4	4	4		RLBB	Resident LBB
LAVA	4	2	MGBB	4	4	5
LEGEND	4	3	MGBB	2	2	3
LEUCADIA	4	3	MGBB	2	2	3
LHASA	4	3	MGBB	3	3	4
LINEY	2	3	MGBB	5	5	5
LINUS	4	3	MGBB	3	4	5
LITTLEGASH	4	2	MGBB	5	5	5
LITTLEPRAWN	4	2	MGBB	2	2	3
LOWELL	4	2	MGBB	1	2	2
MALACHITE	4	3	MGBB	1	2	2
MALIBU	4	3	MGBB	3	4	5
MARBLE	3	2	MGBB	3	3	4
MERIDIAN	4	2	MGBB	2	2	3
MOHAWK	4	3	MGBB	4	5	5
MUGSY	4	2	MGBB	5	5	5
MYSTERY	4	3	MGBB	5	5	5
NASSAU	4	2	MGBB	4	5	5
NAUTILUS	4	3	MGBB	1	1	2
NAVEL	4	3	MGBB	5	5	5
NEREIDE	4	2	MGBB	2	2	3
NOLDUS	4	2	MGBB	2	3	3
PICASSO	4	3	MGBB	3	4	4
PIGLET	4	2	MGBB	4	4	5
POINDEXTER	4	3	MGBB	5	5	1
POINTLESS	4	2	MGBB	2	2	3
SIDEWALK	4	2	MGBB	3	3	4
SUNAMI	4	3	MGBB	3	4	4
TYLER	2	2	MGBB	4	5	5
ZEN	4	3	MGBB	2	3	4
ZOT	4	2	MGBB	5	5	5
ACADIA	5	2	RGBB	1	1	5
ALAKOY	5	3	RGBB	1	1	3
ANDES	5	3	RGBB	1	1	2
AQUARIUS	5	2	RGBB	1	1	5
ARIES	5	3	RGBB	1	1	2
ARUGULA	5	2	RGBB	1	1	3
ATLAS	5	3	RGBB	1	1	3
BAELISH	5	3	RGBB	1	1	4
BENJO	5	3	RGBB	1	1	3
DENALI	5	2	RGBB	1	1	4
DENVER	5	3	RGBB	1	1	2
DOC	5	3	RGBB	1	1	4
DOUBLESCOOP	5	1	RGBB	1	1	5
DROGO	5	3	RGBB	1	1	5
DUCHESS	5	2	RGBB	1	1	4
DUKE	5	3	RGBB	1	1	4
EVREN	5	3	RGBB	1	1	3
FRECKLES	5	2	RGBB	1	1	5
KALE	5	3	RGBB	1	1	3
KUNIS	5	2	RGBB	1	1	3
LAMDA	5	3	RGBB	1	1	3
LATTE	5	1	RGBB	1	1	4
LETTICE	5	3	RGBB	1	1	2
LOA	5	1	RGBB	1	1	3
LORD	5	3	RGBB	1	1	5
MAIDEN	5	2	RGBB	1	1	3
MANNY	5	3	RGBB	1	1	5
MILA	5	2	RGBB	1	1	3
MIRA	5	2	RGBB	1	1	4
MOCHA	5	1	RGBB	1	1	4
MONKEY	5	3	RGBB	1	1	2
MONTANA	5	3	RGBB	1	1	5
NEBULA	5	2	RGBB	1	1	4
NOVA	5	2	RGBB	1	1	2
PICARD	5	2	RGBB	1	1	4
POLARIS	5	2	RGBB	1	1	3
POTION	5	2	RGBB	1	1	5
PULSAR	5	3	RGBB	1	1	4
PUMPKIN	5	1	RGBB	1	1	2
QUEENB	5	2	RGBB	1	1	5
QUEST	5	2	RGBB	1	1	2
REGATTA	5	2	RGBB	1	1	5
ROO	5	2	RGBB	1	1	3
SALINGER	5	3	RGBB	1	1	5
SAVA	5	2	RGBB	1	1	3
SMOKEY	5	2	RGBB	1	1	5
SOOT	5	1	RGBB	1	1	2
SUEY	5	2	RGBB	1	1	3
TILLY	5	2	RGBB	1	1	3
TOAD	5	3	RGBB	1	1	4
TRIDENT	5	1	RGBB	1	1	3
TRIMPY	5	2	RGBB	1	1	3
ZION	5	2	RGBB	1	1	4
ZAHARA	5	2	RGBB	1	1	2
NINJA	5	2	RGBB	1	1	2
RIG	5	2	RGBB	1	1	2
FROLIC	5	3	RGBB	1	1	2
BEYOND	3	2	RLBB	1	5	5
BRAT	2	3	RLBB	1	1	2
BRUSH	2	2	RLBB	4	4	5
CAFÉ	3	3	RLBB	1	1	2
COFFEE	3	2	RLBB	5	5	5
CRICK	3	3	RLBB	5	5	5
FAJITA	3	2	RLBB	1	1	2
FLAMBE	3	2	RLBB	3	4	4
FlOTSAM	3	3	RLBB	1	2	2
FLOWER	3	2	RLBB	1	1	2
FLYINGA	3	2	RLBB	5	5	5
FOE	3	3	RLBB	1	1	2
FRIEND	3	2	RLBB	1	3	4
FUDGE	3	2	RLBB	5	5	5
GELATO	3	2	RLBB	1	4	5
GINGER	3	2	RLBB	1	2	2
GOOGLE	3	3	RLBB	5	5	5
HEDWIG	3	2	RLBB	3	1	5
HELIX	3	3	RLBB	5	5	5
HOOT	3	3	RLBB	1	1	2
ICEBURG	2	3	RLBB	4	4	5
INFINITY	3	2	RLBB	5	5	5
IRIS	3	2	RLBB	1	2	2
ISLAND	3	3	RLBB	5	5	5
JUPITER	3	2	RLBB	1	1	5
KIR	3	1	RLBB	1	1	2
KLONDIKE	3	2	RLBB	5	5	5
NAIA	3	2	RLBB	4	5	5
NEMATOCYST	3	3	RLBB	1	2	3
NORI	3	2	RLBB	1	1	2
OLAF	3	3	RLBB	1	1	3
PALETTE	2	2	RLBB	2	2	3
SHADES	3	3	RLBB	1	2	3
SUMMER	3	2	RLBB	5	5	5
SVEN	3	3	RLBB	1	1	3
TRISTAN	2	2	RLBB	2	2	3
VALENTINE	3	2	RLBB	1	1	4
VEGA	3	3	RLBB	3	3	4
VENTI	3	3	RLBB	1	1	2
VENUS	3	2	RLBB	5	5	5
VINCA	3	2	RLBB	1	1	2
VIOLET	3	2	RLBB	3	4	4
ZIPP	3	2	RLBB	5	5	5
ZULA	3	2	RLBB	1	1	2
